**Efficacy and safety of colchicine after myocardial infarction: a systematic review and meta-analysis**C. Diaz-Arocutipa<sup>1</sup>, J. Benites-Meza<sup>2</sup>, D. Chambergo-Michilot<sup>3</sup>, J. Barboza<sup>1</sup>, V. Pasupuleti<sup>4</sup>, H. Bueno<sup>5</sup>, A. Sambola<sup>6</sup>, A.V. Hernandez<sup>7</sup><sup>1</sup>Universidad San Ignacio de Loyola, Lima, Peru; <sup>2</sup>Universidad Nacional de Trujillo, Trujillo, Peru; <sup>3</sup>Universidad Científica del Sur, Lima, Peru; <sup>4</sup>MedErgy HealthGroup, Yardley, United States of America; <sup>5</sup>Centro Nacional de Investigaciones Cardiovasculares (CNIC), Madrid, Spain; <sup>6</sup>Centro de Investigación Biomédica en Red Enfermedades Cardiovasculares (CIBERCV), Madrid, Spain; <sup>7</sup>University of Connecticut School of Pharmacy, Storrs, United States of America**Funding Acknowledgement:** Type of funding sources: None.**Background:** Inflammation plays a key role in atherosclerotic plaque destabilization and adverse cardiac remodeling. Recent evidence has shown a promising role of colchicine in patients with coronary artery disease.**Purpose:** We evaluated the efficacy and safety of colchicine in post-acute myocardial infarction (MI) patients.**Methods:** We searched five electronic databases from inception to January 18, 2021, for randomized controlled trials (RCTs) evaluating colchicine in post-acute MI patients. Primary outcomes were cardiovascular mortality and recurrent MI. Secondary outcomes were all-cause mortality, stroke, urgent coronary revascularization, levels of follow-up high-sensitivity C-reactive protein (hs-CRP), and drug-related adverse events. All meta-analyses used inverse-variance random-effects models.**Results:** Six RCTs (n=6005) patients were included. Colchicine did not significantly reduce cardiovascular mortality (risk ratio [RR], 0.91; 95% confidence

interval [95% CI], 0.52–1.61; p=0.64), recurrent MI (RR, 0.87; 95% CI, 0.62–1.22; p=0.28), all-cause mortality (RR, 1.06; 95% CI, 0.61–1.85; p=0.78), stroke (RR, 0.28; 95% CI, 0.07–1.09; p=0.05), urgent coronary revascularization (RR, 0.46; 95% CI, 0.02–8.89; p=0.19), or decreased levels of follow-up hs-CRP (MD, -1.95 mg/L; 95% CI, -12.88 to 8.98; p=0.61) compared to the control group. There was no increase of any adverse event (RR, 0.97; 95% CI, 0.89–1.07; p=0.34) or gastrointestinal adverse events (RR, 2.49; 95% CI, 0.48–12.99; p=0.20). Subgroup analyses by colchicine dose (0.5 versus 1 mg/day), time of follow-up (&lt;1 versus ≥1 year), and treatment duration (≤30 versus &gt;30 days) showed no changes in the overall findings.

**Conclusion:** In post-acute MI patients, colchicine does not reduce cardiovascular or all-cause mortality, recurrent MI, or other cardiovascular outcomes. Also, colchicine did not increase drug-related adverse events.**Effect of colchicine versus control on (a) cardiovascular mortality and (b) recurrent myocardial infarction**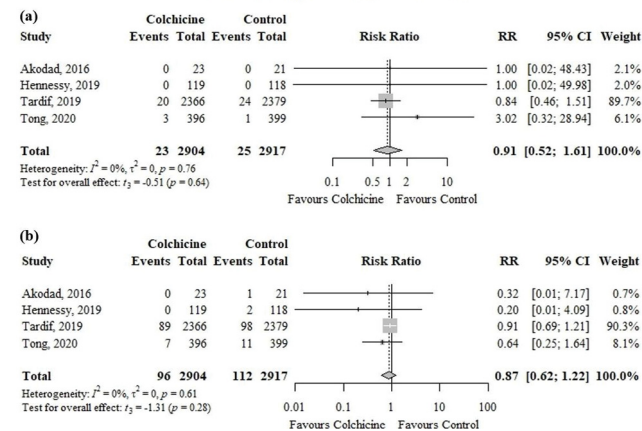**Effects of colchicine on (a) all-cause mortality, (b) stroke, (c) urgent coronary revascularization, (d) any adverse events, (e) gastrointestinal adverse events, and (f) follow-up levels of (mg/L)**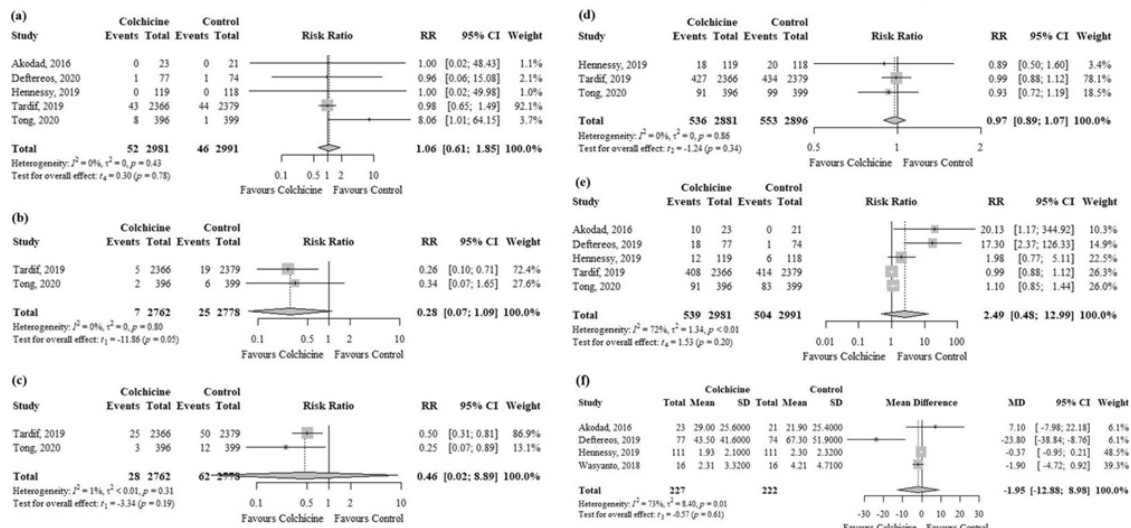

Source: http://academic.oup.com/eurheartj/article-pdf/42/Supplement_1/ehab724.1418/40594530/ehab724.1418.pdf
